# Supplementary material for: Pelagic ecosystem dynamics between late autumn and the post spring bloom in a sub-Arctic fjord
Source: Oxford University Press journal article supplement (doi:10.1525/elementa.2021.00070), 2022-01-01
Supplement: walker_et_al_supplementary_material_20220208.docx [file walker_et_al_supplementary_material_20220208.docx]

Supplementary material - Pelagic ecosystem dynamics between late autumn and the post spring bloom in a high latitude fjord

E. Zoe Walker1*2, Ingrid Wiedmann1, Anna Nikolopoulos3, Jofrid Skarðhamar3, Elizabeth M. Jones3, Angelika H. H. Renner3

1 UiT The Arctic University of Norway, Tromsø, Norway

2 University of Akureyri, University Centre of the Westfjords, Ísafjörður, Iceland

3 Institute of Marine Research, Tromsø, Norway

*corresponding author ([zwyukon@gmail.com](mailto:zwyukon@gmail.com))

# Supplementary Figures and Tables

**Figure S1:** **Maps showing the location of station KaF and other relevant fjords**. Sub-maps present the relevant fjords in a) Svalbard and b) Northern Norway.

**Figure S2: Hydrographic time series in Malangen (see Figure S1) from August 2017 to February 2018.** Sub-plots present a) potential temperature, b) practical salinity, and c) potential density in the upper 200 m at a sampling station in Malangen. Grey triangles along the top axis of each panel mark the sample times.

**Figure S3**: **Nitrate (a) and silicate (b) concentration in inner Kaldfjorden (October 2017 to May 2018)**. The top figure shows the seasonal variation of the nitrate (NO3-) concentration at position (69.700° N, 18.660° E)determined from water samples at subsurface, ~25m, ~50 m, ~75 m, and close to sea floor, while the bottom figure shows the silicate (Si(OH)2) concentration determined from the same depths. The darker the color in the color scheme, the higher the concentration.

**Figure S4**: **Nitrate (a) and silicate (b) concentration in outer Kaldfjorden (October 2017 to May 2018)**. The top figure shows the seasonal variation of the nitrate (NO3-) concentration at position (69.800° N, 18.670° E)determined from water samples at subsurface, ~50 m, ~100 m, ~150 m and close to sea floor, while the bottom figure shows the silicate (Si(OH)2) concentration determined from the same depths. The darker the color in the color scheme, the higher the concentration.

**Table S1: Overview of the water volume used to determine the suspended and sinking biomass.** The table gives the volume of water (mL) filtered to determine the concentration of suspended (susp) chlorophyll *a* (Chl *a*) and particulate organic carbon and nitrogen (POC/N) and the intensity of the vertical Chl *a* and POC/N flux. All filtrations were done in (at least) triplicates.

**Table S2: Suspended biomass concentration at KaF.** The table presents the average (av) concentrations (incl. the standard deviations (stand dev)) of the suspended chlorophyll *a* (Chl *a*) and phaeophytine (Phaeo), the ratio of Chl *a* to the total pigment concentration (= Chl *a* + Phaeo), the concentration of particulate organic carbon (POC) and particulate organic nitrogen (PON), as well as the atomic ratio of POC: PON (C: N). “Replicates” states the number of replicates used in filtration.

**Table S3:** **Vertical flux** **of biomass at KaF.** Average (Av) vertical flux (incl. standard deviation (stand dev)) of chlorophyll *a* (Chl *a*) and phaeophytine (Phaeo) as well as the ratio of Chl *a* flux to total pigment flux (= Chl *a* + Phaeo). In addition, the table presents the average flux of particulate organic carbon (POC), particulate organic nitrogen (PON), and the atomic POC: PON ratio (C: N) of the exported biomass. “Replicates” states the number of replicates used in the filtration.

**Table S4:** **Zooplankton abundance at station KaF.** Zooplankton (holoplankton and meroplankton) was sampled with a WP‐2, 180 µm mesh size, and abundances are given as the average number of individuals m‑3 in the given depth interval. Please note that the rather coarse mesh size of the WP-2 may have resulted in some undersampling of taxa < 200 µm.


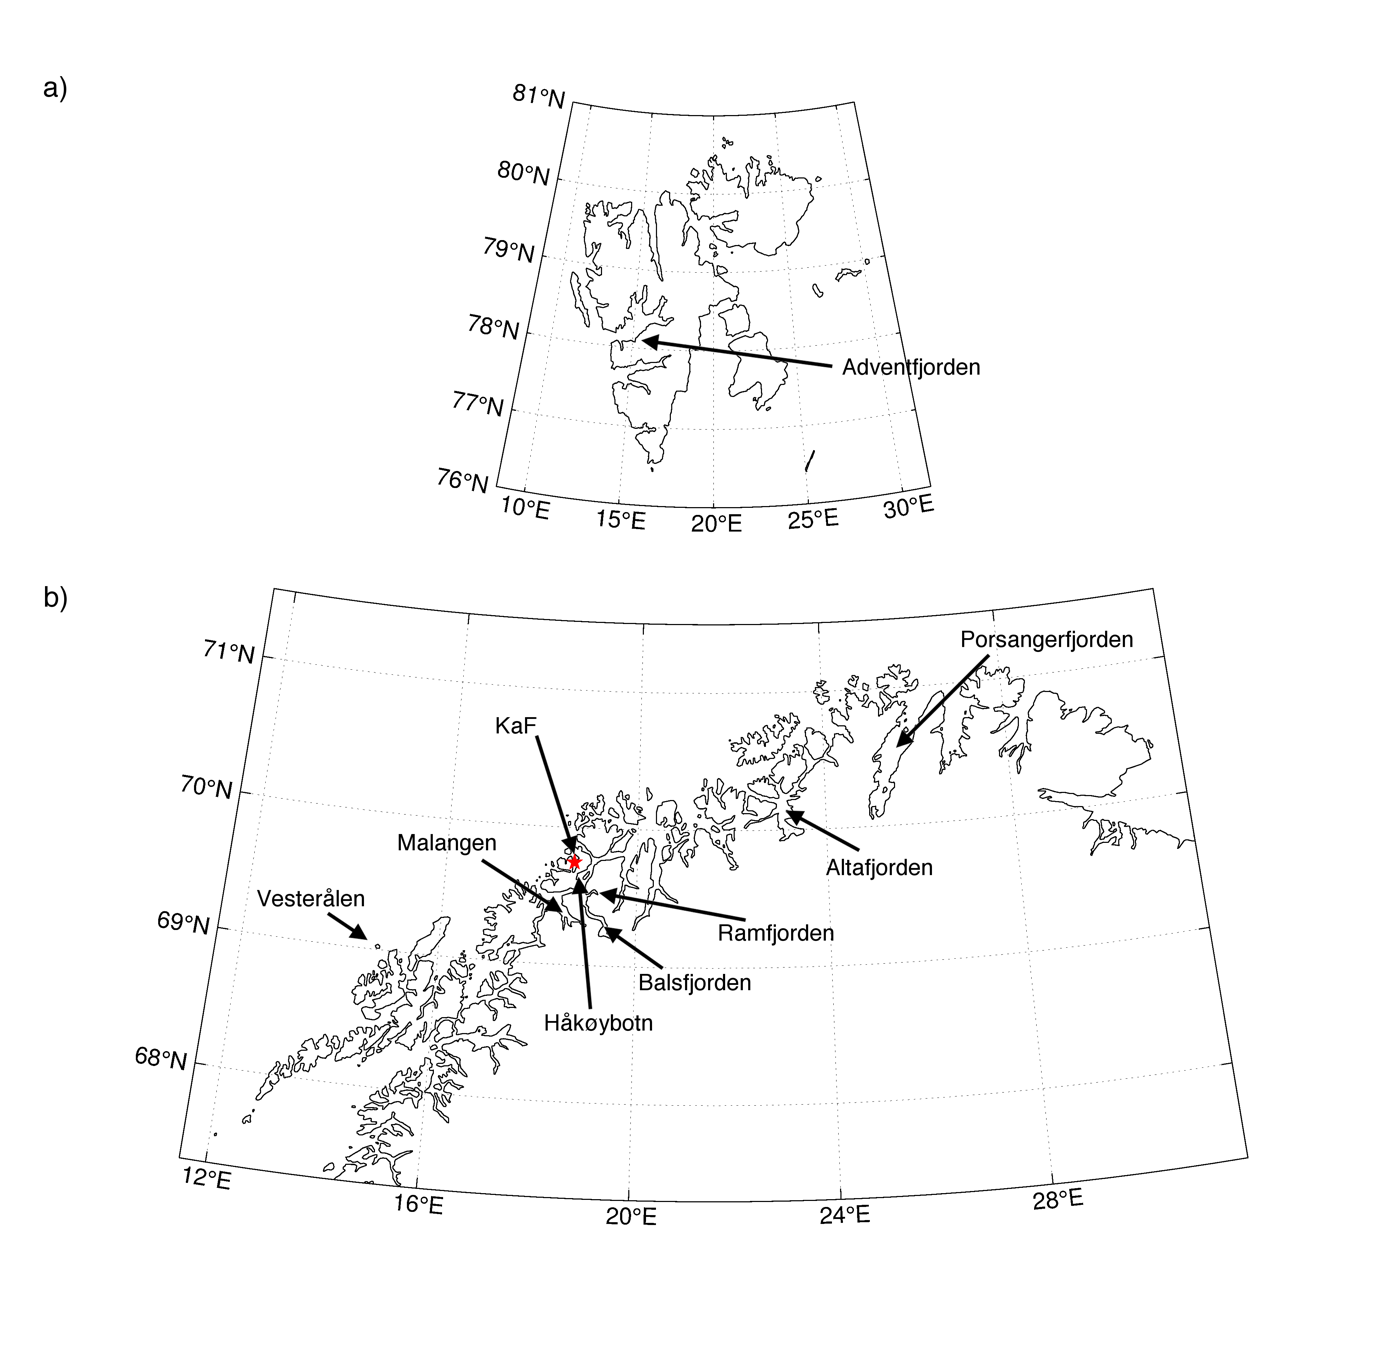


**Figure S1:** **Maps showing the location of station KaF and other relevant fjords**. Sub-maps present the relevant fjords in a) Svalbard and b) Northern Norway.

**
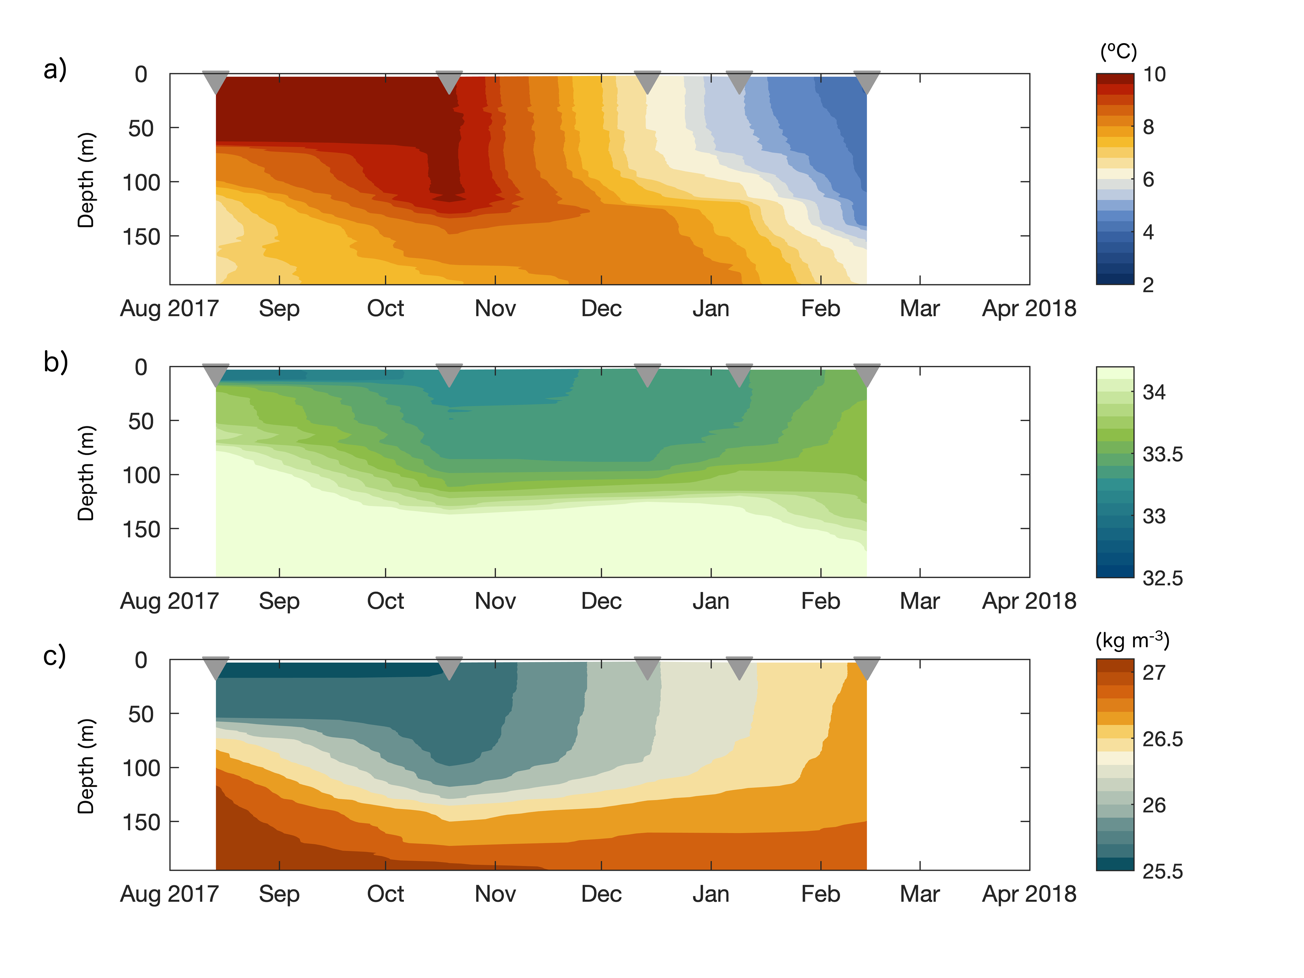
Figure S2: Hydrographic time series in Malangen (see Figure S1) from August 2017 to February 2018.** Sub-plots present a) potential temperature, b) practical salinity, and c) potential density in the upper 200 m at a sampling station in Malangen. Grey triangles along the top axis of each panel mark the sample times.


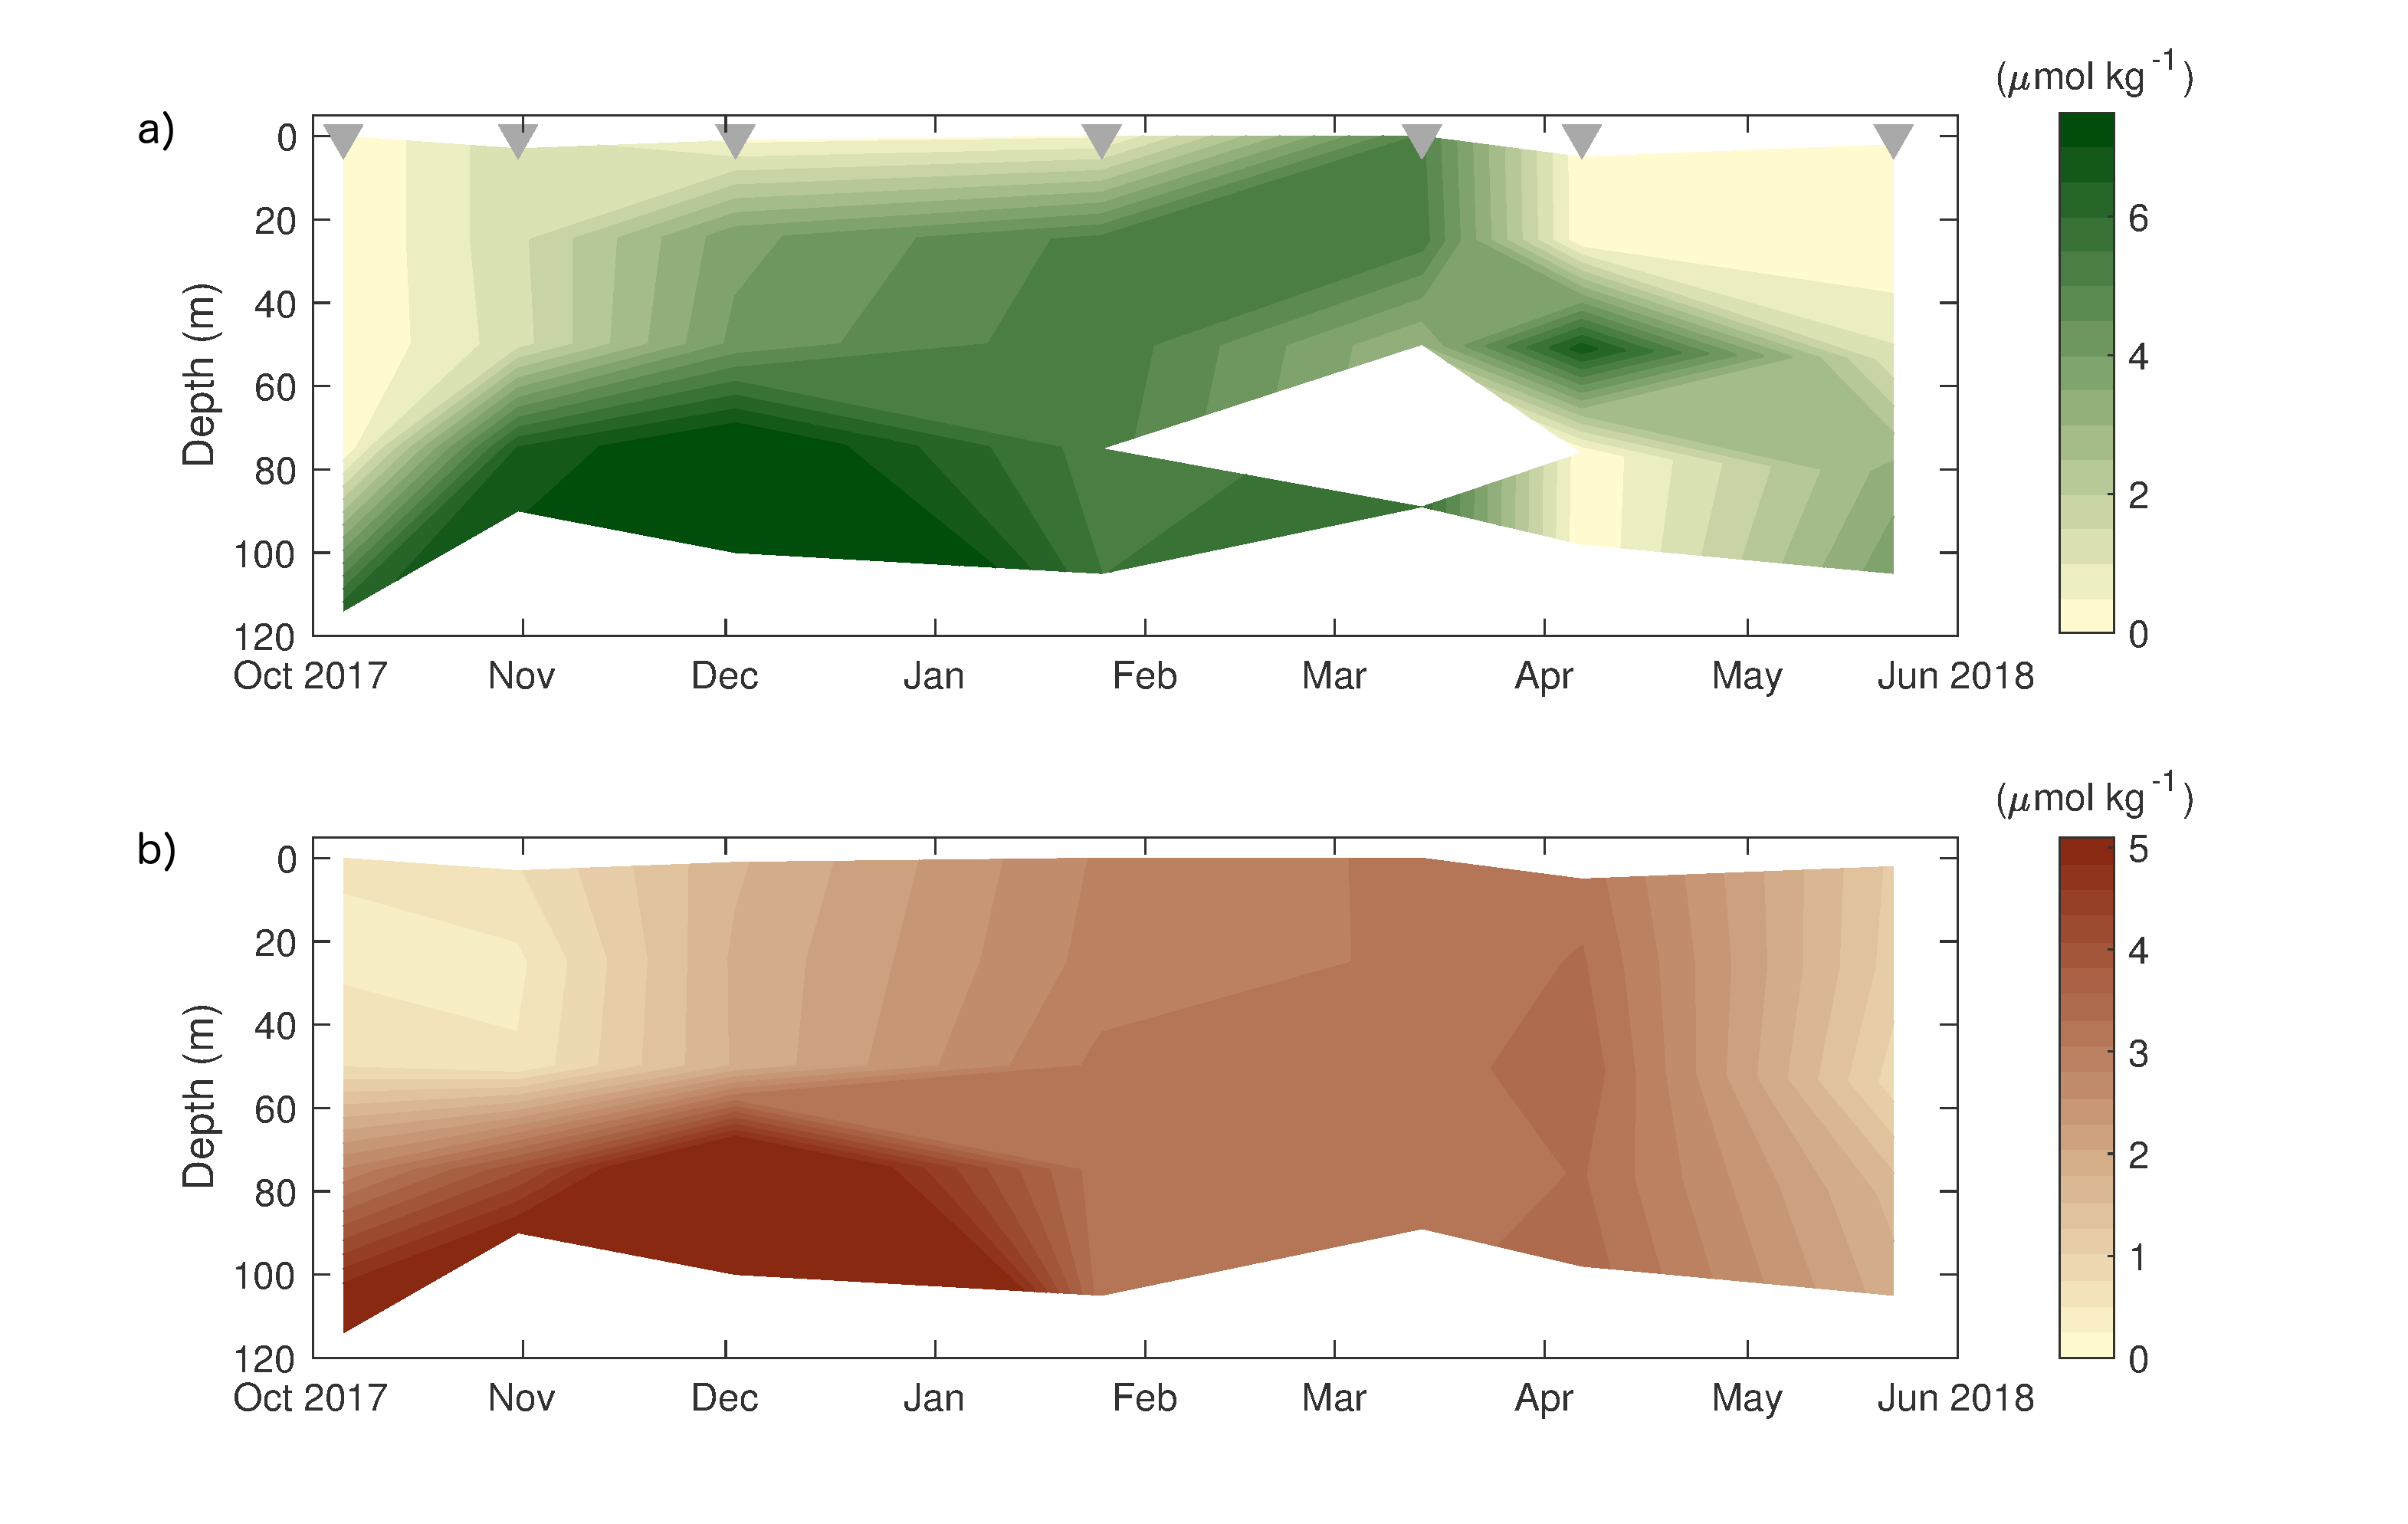


**Figure S3**: **Nitrate (a) and silicate (b) concentration in inner Kaldfjorden (October 2017 to May 2018)**. The top figure shows the seasonal variation of the nitrate (NO3-) concentration at position (69.700° N, 18.660° E)determined from water samples at subsurface, ~25m, ~50 m, ~75 m, and close to sea floor, while the bottom figure shows the silicate (Si(OH)2) concentration determined from the same depths. The darker the color in the color scheme, the higher the concentration.


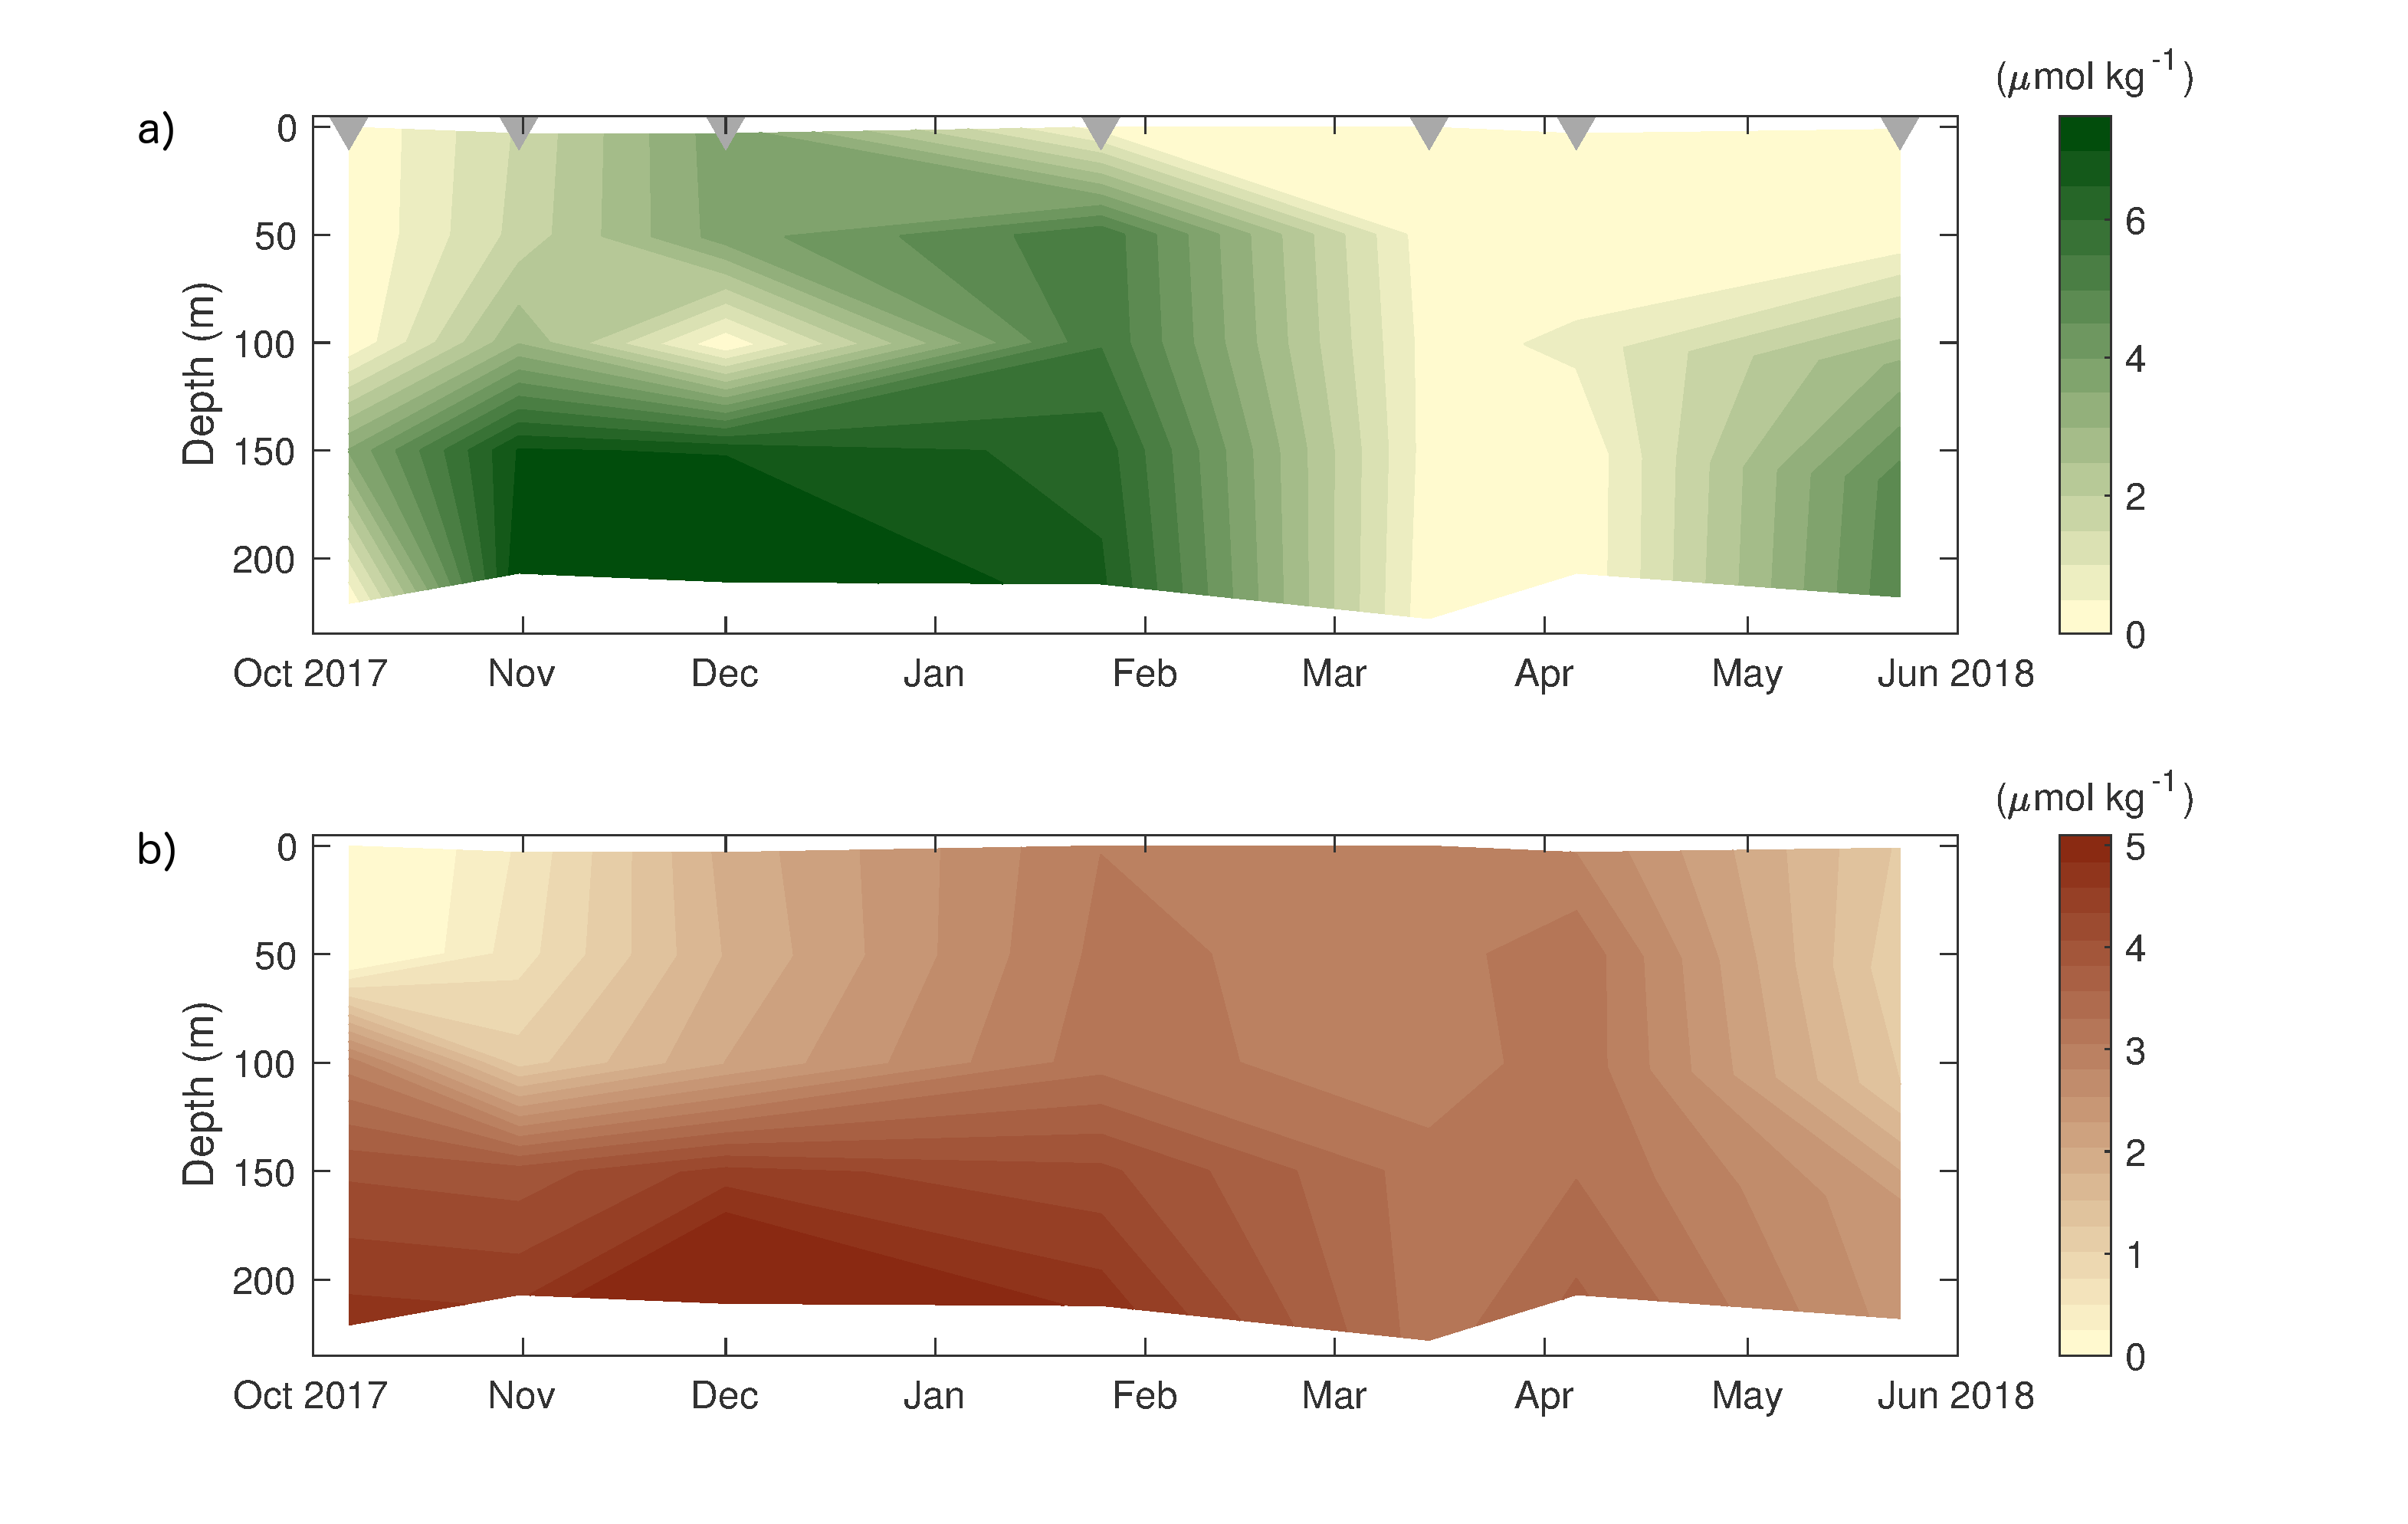


**Figure S4**: **Nitrate (a) and silicate (b) concentration in outer Kaldfjorden (October 2017 to May 2018)**. The top figure shows the seasonal variation of the nitrate (NO3-) concentration at position (69.800° N, 18.670° E)determined from water samples at subsurface, ~50 m, ~100 m, ~150 m and close to sea floor, while the bottom figure shows the silicate (Si(OH)2) concentration determined from the same depths. The darker the color in the color scheme, the higher the concentration.

**Table S1: Overview of the water volume used to determine the suspended and sinking biomass.** The table gives the volume of water (mL) filtered to determine the concentration of suspended (susp) chlorophyll *a* (Chl *a*) and particulate organic carbon and nitrogen (POC, PO N) and the intensity of the downward Chl *a* , POC, and PO N flux. All filtrations were done in (at least) triplicates.

| **Month** | **Susp Chl *a* concentration (mL)** | **Downward Chl *a* flux (mL)** | **Susp POC and PO** **N concentration (mL)** | **Downward POC**  **and PON flux (mL)** |
| --- | --- | --- | --- | --- |
| Oct | 300 | 200 | 400 | 300 |
| Nov | 300 | 200 | 400 | 300 |
| Dec | 300-400 | 300 | 400 | 300 |
| Jan | 300 | 300 | 400 | 300 |
| Feb | 300 | 300 | 400 | 300 |
| Mar | 300 | 250 | 400 | 250 |
| Apr | 200 | 200 | 400 | 250 |
| May | 250 | 200 | 400 | 300 |

**Table S2: Suspended biomass concentration at KaF.** The table presents the average (av) concentrations (incl. the standard deviations (stand dev)) of the suspended chlorophyll *a* (Chl *a*) and phaeophytine (Phaeo), the ratio of Chl *a* to the total pigment concentration (= Chl *a* + Phaeo), the concentration of particulate organic carbon (POC) and particulate organic nitrogen (PON), as well as the atomic ratio of POC: PON (C: N). “Replicates” states the number of replicates used in filtration. NA - Data not available.

| **Date**  **(ddmmyyyy)** | **Depth**  **(m)** | **Replicates**  **(Chl *a*)** | **Av Chl *a***  **(mg m-3)** | **Chl *a***  **stand dev** | **Av Phaeo**  **(mg m-3)** | **Phaeo**  **stand dev** | **Ratio Chl *a* to (Chl *a* + Phaeo)** | **Replicates (POC, PON)** | **Av POC**  **(mg m-3)** | **POC**  **stand dev** | **Av PON**  **(mg m-3)** | **Av PON**  **stand dev** | **Av C:N ratio** | **C:N ratio stand dev** | **POC:**  **Chl a** |
| --- | --- | --- | --- | --- | --- | --- | --- | --- | --- | --- | --- | --- | --- | --- | --- |
| 05.10.2017 | 5 | 3 | 3.15 | 0.08 | 1.93 | 0.08 | 0.62 | 2 | 315.44 | 7.19 | 44.65 | 0.26 | 8.24 | 0.24 | 100 |
| 05.10.2017 | 15 | 3 | 2.42 | 0.23 | 1.47 | 0.10 | 0.62 | 3 | 231.85 | 49.99 | 36.22 | 8.62 | 7.49 | 0.16 | 96 |
| 05.10.2017 | 30 | 3 | 1.42 | 0.08 | 0.91 | 0.08 | 0.61 | 3 | 191.60 | 14.08 | 30.80 | 1.72 | 7.25 | 0.13 | 135 |
| 05.10.2017 | 90 | 3 | 0.09 | 0.01 | 0.17 | 0.03 | 0.35 | 3 | 124.87 | 34.30 | 19.80 | 3.24 | 7.28 | 1.03 | 1391 |
| 06.11.2017 | 5 | 3 | 1.03 | 0.02 | 0.66 | 0.06 | 0.61 | 3 | 102.43 | 22.26 | 17.05 | 4.22 | 7.07 | 0.88 | 99 |
| 06.11.2017 | 15 | 3 | 0.91 | 0.10 | 0.57 | 0.02 | 0.61 | 3 | 82.34 | 6.29 | 12.25 | 0.59 | 7.83 | 0.29 | 91 |
| 06.11.2017 | 30 | 3 | 0.90 | 0.09 | 0.65 | 0.06 | 0.58 | 3 | 117.21 | 8.03 | 18.50 | 0.62 | 7.41 | 0.72 | 130 |
| 06.11.2017 | 90 | 3 | 0.26 | 0.03 | 0.26 | 0.01 | 0.50 | 3 | 216.78 | 17.50 | 26.07 | 2.18 | 9.73 | 1.00 | 825 |
| 01.12.2017 | 5 | 3 | 0.12 | 0.02 | 0.17 | 0.01 | 0.41 | 3 | 31.94 | 9.29 | 5.94 | 0.30 | 7.40 | 2.01 | 268 |
| 01.12.2017 | 15 | 3 | 0.10 | 0.01 | 0.17 | 0.00 | 0.37 | 3 | 20.18 | 4.04 | 3.97 | 1.49 | 8.31 | 3.08 | 198 |
| 01.12.2017 | 30 | 3 | 0.11 | 0.01 | 0.17 | 0.01 | 0.40 | 3 | 32.76 | 5.90 | 6.80 | 1.32 | NA | 0.47 | 299 |
| 01.12.2017 | 90 | 3 | 0.12 | 0.01 | 0.18 | 0.02 | 0.40 | 3 | 132.70 | 50.44 | 11.18 | 2.29 | 13.48 | 3.06 | 1117 |
| 25.01.2018 | 5 | 3 | 0.03 | 0.00 | 0.08 | 0.01 | 0.25 | 3 | 80.82 | 15.85 | 10.24 | 1.52 | 9.18 | 0.78 | 3158 |
| 25.01.2018 | 15 | 3 | 0.03 | 0.00 | 0.07 | 0.01 | 0.26 | 3 | 55.02 | 6.48 | 7.63 | 0.91 | 8.56 | 1.95 | 2212 |
| 25.01.2018 | 30 | 3 | 0.02 | 0.00 | 0.06 | 0.00 | 0.28 | 3 | 57.45 | 3.54 | 7.83 | 1.08 | 8.63 | 0.82 | 2418 |
| 25.01.2018 | 90 | 3 | 0.03 | 0.00 | 0.06 | 0.01 | 0.29 | 3 | 101.39 | 25.44 | 14.75 | 0.58 | 8.05 | 2.17 | 4031 |
| 15.02.2018 | 5 | 3 | 0.03 | 0.00 | 0.09 | 0.01 | 0.24 | 3 | 56.70 | 8.86 | 6.32 | 0.31 | 10.45 | 1.30 | 1954 |
| 15.02.2018 | 15 | 3 | 0.03 | 0.00 | 0.10 | 0.03 | 0.23 | 3 | 67.61 | 2.58 | 8.84 | 1.45 | 9.07 | 1.27 | 2258 |
| 15.02.2018 | 30 | 3 | 0.03 | 0.00 | 0.06 | 0.01 | 0.31 | 3 | 81.37 | 10.78 | 11.72 | 2.82 | 8.26 | 1.18 | 2933 |
| 15.02.2018 | 90 | 3 | 0.03 | 0.01 | 0.07 | 0.01 | 0.31 | 3 | 114.39 | 6.08 | 17.78 | 0.72 | 7.52 | 0.63 | 3754 |
| 14.03.2018 | 5 | 3 | 0.03 | 0.00 | 0.04 | 0.00 | 0.44 | 3 | 35.48 | 1.21 | 6.04 | 2.01 | 7.33 | 2.22 | 1124 |
| 14.03.2018 | 15 | 4 | 0.03 | 0.00 | 0.04 | 0.00 | 0.42 | 4 | 39.97 | 13.54 | 4.54 | 1.49 | 10.94 | 3.78 | 1270 |
| 14.03.2018 | 30 | 4 | 0.03 | 0.00 | 0.04 | 0.01 | 0.44 | 4 | 24.58 | 0.37 | 4.44 | 1.00 | 7.25 | 1.51 | 796 |
| 14.03.2018 | 90 | 3 | 0.03 | 0.00 | 0.04 | 0.01 | 0.37 | 3 | 30.30 | 1.69 | 5.97 | 1.09 | 6.56 | 1.03 | 1225 |
| 04.04.2018 | 5 | 3 | 6.88 | 0.17 | 5.74 | 0.62 | 0.55 | 3 | 264.60 | 14.81 | 51.62 | 1.45 | 5.98 | 0.20 | 38 |
| 04.04.2018 | 15 | 3 | 7.18 | 0.20 | 5.33 | 0.08 | 0.57 | 3 | 253.62 | 4.63 | 51.82 | 3.27 | 5.72 | 0.34 | 35 |
| 04.04.2018 | 30 | 3 | 1.77 | 0.10 | 1.54 | 0.10 | 0.53 | 3 | 69.14 | 6.03 | 14.21 | 0.24 | 5.68 | 0.46 | 39 |
| 04.04.2018 | 90 | 3 | 0.10 | 0.00 | 0.18 | 0.01 | 0.36 | 3 | 54.36 | 12.60 | 6.80 | 2.37 | 9.90 | 2.78 | 558 |
| 22.05.2018 | 5 | 3 | 0.58 | 0.02 | 0.70 | 0.08 | 0.45 | 3 | 210.18 | 2.47 | 31.29 | 1.24 | 7.84 | 0.25 | 361 |
| 22.05.2018 | 15 | 3 | 0.89 | 0.01 | 1.10 | 0.04 | 0.45 | 3 | 153.47 | 14.61 | 26.52 | 0.65 | 6.74 | 0.52 | 173 |
| 22.05.2018 | 30 | 3 | 0.13 | 0.01 | 0.34 | 0.03 | 0.28 | 3 | 70.66 | 4.01 | 9.74 | 0.77 | 8.52 | 1.05 | 529 |
| 22.05.2018 | 90 | 3 | 0.02 | 0.00 | 0.10 | 0.02 | 0.17 | 3 | 93.87 | 8.26 | 9.94 | 1.08 | 11.06 | 0.91 | 4505 |

**Table S3:** Downward  **flux** **of biomass at KaF.** Average (Av) downwards flux (incl. standard deviation (stand dev)) of chlorophyll *a* (Chl *a*) and phaeophytine (Phaeo) as well as the ratio of the Chl *a* to total pigment flux ratio (= Chl *a* + Phaeo) in the sediment trap cylinder. In addition, the table presents the average downward flux of particulate organic carbon (POC) and particulate organic nitrogen (PON), as well as the atomic POC: PON ratio (C: N) and the POC: Chl a ratio of the exported biomass in the trap cylinder. “Replicates” states the number of replicates used in the filtration.

| **Date**  **(ddmmyyyy)** | **Depth**  **(m)** | **Replicates**  **(Chl *a*)** | **Av Chl *a* flux**  **(mg m-2 d-1)** | **Av Phaeo flux**  **(mg m-2 d-1)** | **Phaeo flux**  **stand dev** | **Ratio Chl *a*: (Chl *a* + Phaeo)** | **Replicates**  **(POC, PON)** | **Av POC flux**  **(mg m-2 d-1)** | **Av PON flux**  **(mg m-2 d-1)** | **Av C:N ratio** | **Av POC: Chl a** |
| --- | --- | --- | --- | --- | --- | --- | --- | --- | --- | --- | --- |
| 05.10.2017 | 20 | 2 | 1.21 | 1.39 | 0.01 | 0.47 | 3 | 136.85 | 25.48 | 6.64 | 477 |
| 05.10.2017 | 30 | 3 | 1.37 | 2.13 | 0.05 | 0.39 | 3 | 160.08 | 30.39 | 6.56 | 215 |
| 05.10.2017 | 50 | 3 | 1.14 | 1.65 | 0.24 | 0.41 | 3 | 140.90 | 21.09 | 7.62 | 195 |
| 05.10.2017 | 90 | 3 | 1.10 | 2.05 | 0.15 | 0.35 | 3 | 259.64 | 37.47 | 7.99 | 244 |
| 06.11.2017 | 20 | 3 | 0.53 | 0.74 | 0.10 | 0.42 | 3 | 89.42 | 14.89 | 7.33 | 623 |
| 06.11.2017 | 30 | 3 | 0.58 | 0.94 | 0.13 | 0.38 | 3 | 46.04 | 6.49 | 7.81 | 239 |
| 06.11.2017 | 50 | 3 | 0.58 | 0.86 | 0.15 | 0.40 | 3 | 47.68 | 8.29 | 7.40 | 147 |
| 06.11.2017 | 90 | 3 | 0.66 | 1.24 | 0.06 | 0.35 | 3 | 166.60 | 24.66 | 8.46 | 306 |
| 01.12.2017 | 20 | 3 | 0.09 | 0.29 | 0.03 | 0.24 | 3 | 37.18 | 6.34 | 6.48 | 768 |
| 01.12.2017 | 30 | 3 | 0.11 | 0.35 | 0.03 | 0.24 | 3 | 33.84 | 5.42 | 6.70 | 519 |
| 01.12.2017 | 50 | 3 | 0.10 | 0.32 | 0.01 | 0.25 | 3 | 39.67 | 5.19 | 7.26 | 655 |
| 01.12.2017 | 90 | 3 | 0.10 | 0.35 | 0.01 | 0.23 | 3 | 8.52 | 3.79 | 9.04 | 164 |
| 25.01.2018 | 20 | 3 | 0.07 | 0.24 | 0.03 | 0.22 | 3 | 91.36 | 12.98 | 8.38 | 1579 |
| 25.01.2018 | 30 | 3 | 0.10 | 0.35 | 0.02 | 0.22 | 3 | 104.40 | 13.53 | 8.92 | 1171 |
| 25.01.2018 | 50 | 3 | 0.07 | 0.29 | 0.03 | 0.20 | 3 | 104.07 | 13.12 | 9.04 | 1594 |
| 25.01.2018 | 90 | 3 | 0.10 | 0.41 | 0.03 | 0.19 | 3 | 107.33 | 14.49 | 8.45 | 1221 |
| 15.02.2018 | 20 | 3 | 0.11 | 0.23 | 0.07 | 0.33 | 3 | 91.77 | 11.37 | 9.22 | 917 |
| 15.02.2018 | 30 | 3 | 0.08 | 0.25 | 0.04 | 0.24 | 3 | 69.77 | 9.14 | 8.63 | 984 |
| 15.02.2018 | 50 | 3 | 0.10 | 0.32 | 0.02 | 0.24 | 3 | 78.09 | 8.90 | 9.25 | 921 |
| 15.02.2018 | 90 | 3 | 0.08 | 0.24 | 0.02 | 0.24 | 3 | 69.21 | 7.05 | 9.45 | 1064 |
| 14.03.2018 | 20 | 3 | 0.04 | 0.08 | 0.01 | 0.33 | 3 | 28.76 | 4.72 | 7.73 | 938 |
| 14.03.2018 | 30 | 3 | 0.04 | 0.09 | 0.01 | 0.29 | 3 | 43.44 | 7.64 | 6.72 | 2045 |
| 14.03.2018 | 50 | 3 | 0.04 | 0.12 | 0.01 | 0.23 | 3 | 51.92 | 8.27 | 7.07 | 2177 |
| 14.03.2018 | 90 | 3 | 0.05 | 0.20 | 0.02 | 0.20 | 3 | 83.08 | 11.21 | 8.17 | 2263 |
| 04.04.2018 | 20 | 3 | 5.34 | 3.60 | 0.14 | 0.60 | 3 | 135.79 | 24.30 | 6.15 | 43 |
| 04.04.2018 | 30 | 3 | 3.87 | 3.39 | 0.26 | 0.53 | 3 | 117.40 | 21.12 | 6.32 | 37 |
| 04.04.2018 | 50 | 3 | 3.42 | 3.15 | 0.20 | 0.52 | 3 | 124.57 | 22.47 | 6.49 | 43 |
| 04.04.2018 | 90 | 3 | 3.15 | 3.18 | 0.18 | 0.50 | 3 | 157.74 | 28.02 | 6.82 | 51 |
| 22.05.2018 | 20 | 3 | 0.89 | 1.57 | 0.28 | 0.36 | 3 | 140.93 | 22.54 | 7.19 | 222 |
| 22.05.2018 | 30 | 3 | 0.40 | 1.22 | 0.16 | 0.25 | 3 | 100.95 | 16.65 | 7.39 | 293 |
| 22.05.2018 | 50 | 3 | 0.30 | 1.38 | 0.19 | 0.18 | 3 | 137.34 | 25.33 | 6.84 | 525 |
| 22.05.2018 | 90 | 3 | 0.22 | 1.18 | 0.28 | 0.16 | 3 | 85.12 | 16.60 | 7.07 | 396 |

**Table S4:** **Zooplankton abundance at station KaF.** Zooplankton (holoplankton and meroplankton) was sampled with a WP‐2, 180 µm mesh size, and abundances are given as the average number of individuals m‑3 in the given depth interval. Please note that the rather coarse mesh size of the WP-2 may have resulted in some undersampling of taxa < 200 µm.

| **Date (dd.mm.yyyy)** | **06.11.2017** | **01.12.2017** | **25.01.2018** | **25.01.2018** | **15.02.2018** | **15.02.2018** | **14.03.2018** | **14.03.2018** | **04.04.2018** | **04.04.2018** | **22.05.2018** | **22.05.2018** |
| --- | --- | --- | --- | --- | --- | --- | --- | --- | --- | --- | --- | --- |
| **Depth interval (m)** | **0-50** | **0-100** | **100-50** | **50-0** | **100-50** | **50-0** | **100-50** | **50-0** | **100-50** | **50-0** | **100-50** | **50-0** |
| **Holoplankton (Copepoda)** | | | | | | | | | | | | |
| *Calanus* | 35.00 | 0.28 | 7.92 | 16.24 | 7.28 | 16.32 | 16.20 | 12.80 | 0.80 | 9.20 | 7752.00 | 6480.00 |
| *Metridia* | 26.67 | 0.08 | 3.84 | 2.48 | 0.64 | 0.48 | 10.00 | 6.40 | 2.80 | 2.80 | 1512.00 | 1253.33 |
| *Acartia* | 366.67 | 40.53 | 1.04 | 7.44 | 4.48 | 3.04 | 0.20 | 1.07 | 0.00 | 0.80 | 132.00 | 13.33 |
| Harpacticoida | 0.00 | 0.00 | 0.00 | 0.00 | 0.08 | 0.08 | 0.00 | 0.00 | 0.00 | 0.00 | 0.00 | 0.00 |
| *Microcalanous* | 0.00 | 28.00 | 10.16 | 8.64 | 25.36 | 19.60 | 51.00 | 62.13 | 379.60 | 125.20 | 108.00 | 26.67 |
| *Oithona* | 1133.33 | 115.20 | 14.80 | 68.24 | 34.88 | 45.84 | 28.20 | 30.40 | 32.40 | 70.00 | 468.00 | 360.00 |
| *Pseudocalanus* | 3013.33 | 181.60 | 10.64 | 35.52 | 6.64 | 4.96 | 3.00 | 3.47 | 9.60 | 4.80 | 396.00 | 586.67 |
| Unidentified copepod | 106.67 | 6.40 | 1.12 | 1.60 | 1.04 | 0.72 | 1.40 | 1.87 | 4.00 | 7.60 | 132.00 | 186.67 |
| **Holoplankton (Others)** | | | | | | | | | | | | |
| Amphipoda | 23.75 | 0.16 | 0.16 | 0.32 | 0.00 | 0.00 | 0.08 | 0.16 | 0.32 | 0.00 | 0.00 | 0.00 |
| Appendicularian | 60.00 | 0.00 | 0.00 | 0 | 0.00 | 0.24 | 0.00 | 0.00 | 0.00 | 1.36 | 0.00 | 0.16 |
| Chaetognatha | 6.67 | 0.00 | 0.00 | 0.24 | 0.00 | 0.32 | 0.00 | 0.16 | 0.00 | 0.00 | 0.08 | 0.00 |
| Cnidaria | 39.58 | 0.00 | 0.72 | 0.16 | 0.00 | 0.08 | 0.00 | 0.00 | 0.00 | 0.00 | 0.00 | 13.33 |
| Ctenophora | 46.67 | 0.00 | 0.00 | 0.96 | 0.88 | 0.00 | 0.24 | 0.00 | 0.40 | 0.08 | 0.00 | 0.24 |
| Ichthyoplankton | 0.00 | 0.00 | 0.00 | 0.00 | 0.00 | 0.00 | 0.00 | 0.00 | 0.00 | 0.00 | 0.00 | 1.28 |
| Krill Nauplii | 0.00 | 0.00 | 0.00 | 0.00 | 0.00 | 0.00 | 0.16 | 0.08 | 0.24 | 0.80 | 0.00 | 0.00 |
| Krill Juvenile | 0.00 | 0.00 | 0.00 | 0.00 | 0.00 | 0.00 | 0.00 | 0.00 | 0.00 | 0.00 | 12.00 | 126.67 |
| Limacina | 510.00 | 37.07 | 0.00 | 0.00 | 0.00 | 0.00 | 0.00 | 0.00 | 0.00 | 0.00 | 0.00 | 0.00 |
| Pelagic polychaeta | 96.67 | 0.00 | 0.00 | 0.00 | 0.08 | 0.00 | 0.00 | 0.00 | 0.00 | 0.08 | 18.00 | 0.00 |
| **Meroplankton larvae** | | | | | | | | | | | | |
| Bivalvia | 0.00 | 0.00 | 0.00 | 0.08 | 0.08 | 0.00 | 0.00 | 0.08 | 0.00 | 0.00 | 0.00 | 0.00 |
| Bryozoa | 0.00 | 0.00 | 0.00 | 0.08 | 0.08 | 0.88 | 0.00 | 0.00 | 0.00 | 0.00 | 0.00 | 13.33 |
| Cirripedia | 0.00 | 0.53 | 0.32 | 0.08 | 0.00 | 0.00 | 0.00 | 0.24 | 4.88 | 286.80 | 6.00 | 166.67 |
| Decapoda | 0.00 | 0.00 | 0.00 | 0.00 | 0.00 | 0.00 | 0.00 | 0.00 | 0.00 | 0.00 | 0.08 | 40.00 |
| Echinodermata | 976.67 | 0.00 | 0.00 | 0.00 | 0.00 | 0.00 | 0.08 | 0.00 | 0.32 | 2.80 | 0.32 | 0.00 |
| Gastropoda | 300.00 | 2.40 | 0.00 | 0.48 | 0.64 | 0.00 | 0.24 | 0.08 | 0.00 | 0.88 | 0.16 | 46.67 |
| Polychaeta | 3.33 | 0.00 | 0.00 | 0.16 | 0.24 | 0.00 | 0.72 | 0.80 | 0.88 | 246.80 | 12.00 | 0.00 |
| **Total zooplankton abundance (ind. m‑3) per month in the whole sampling interval** | 6745 | 412 | 97 | | 87 | | 116 | | 598 | | 9931 | |
